# Supplementary material
Source: publisher figshare collection journal article supplement (https://acs.figshare.com/ndownloader/files/4573348)

## Supporting Information

# Extra Binding Region Induced by Non-Zinc Chelating Inhibitors into the S<sub>1</sub>' Subsite of Matrix Metalloproteinase 8 (MMP-8)

*Giorgio Pochetti<sup>1</sup>, Roberta Montanari<sup>1</sup>, Christian Gege<sup>2,\*</sup>, Carine Chevrier<sup>2</sup>, Arthur G. Taveras<sup>3,§</sup> &  
Fernando Mazza<sup>1,4</sup>*

### Content

Page 1: Table S1: C<sup>α</sup> distances at the S<sub>1</sub>' loop region between the uninhibited MMP-8 and the inhibited complexes MMP-8:**1** and MMP-8:(S)-**2**.

Elemental analyses of compound **1** and **2**.

Page 2: <sup>1</sup>H NMR (DMSO-*d*<sub>6</sub>) spectra of compound **1**.

Page 3: <sup>1</sup>H NMR (DMSO-*d*<sub>6</sub>) spectra of compound **2**.

**Table S1.** C<sup>α</sup> distances (Å) at the S<sub>1</sub>' loop region between the uninhibited MMP-8 and the inhibited complexes MMP-8:**1** (first row), MMP-8:(S)-**2** (second row). The sequences 86-218 and 230-242 of the enzyme backbones were overlapped. The S<sub>1</sub>' loop region was considered between the invariant Y219 and L229. For comparison, the rms differences between the C<sup>α</sup> of chains 86-218 and 230-242 of uninhibited and the two complexed enzymes, respectively are 0.37 and 0.40 Å.

| Y219 | A220 | F221 | R222 | E223 | T224 | S225 | N226 | Y227 | S228 | L229 |
|------|------|------|------|------|------|------|------|------|------|------|
| 0.39 | 0.71 | 0.16 | 2.01 | 1.61 | 5.82 | 5.30 | 1.51 | 0.69 | 0.14 | 0.45 |
| 0.39 | 0.79 | 0.59 | 2.23 | 3.19 | 6.30 | 5.37 | 3.73 | 0.98 | 0.58 | 0.40 |

#### Elemental analyses.

| Compound | Calculated |      |       |       | Found |      |       |       |
|----------|------------|------|-------|-------|-------|------|-------|-------|
|          | C%         | H%   | N%    | S%    | C%    | H%   | N%    | S%    |
| <b>1</b> | 53.42      | 3.92 | 16.98 | 11.89 | 53.82 | 3.78 | 16.95 | 11.85 |
| <b>2</b> | 56.52      | 4.53 | 14.98 | 6.86  | 56.50 | 4.49 | 15.03 | 6.89  |

**<sup>1</sup>H NMR (DMSO-*d*<sub>6</sub>) spectra of compound 1.**

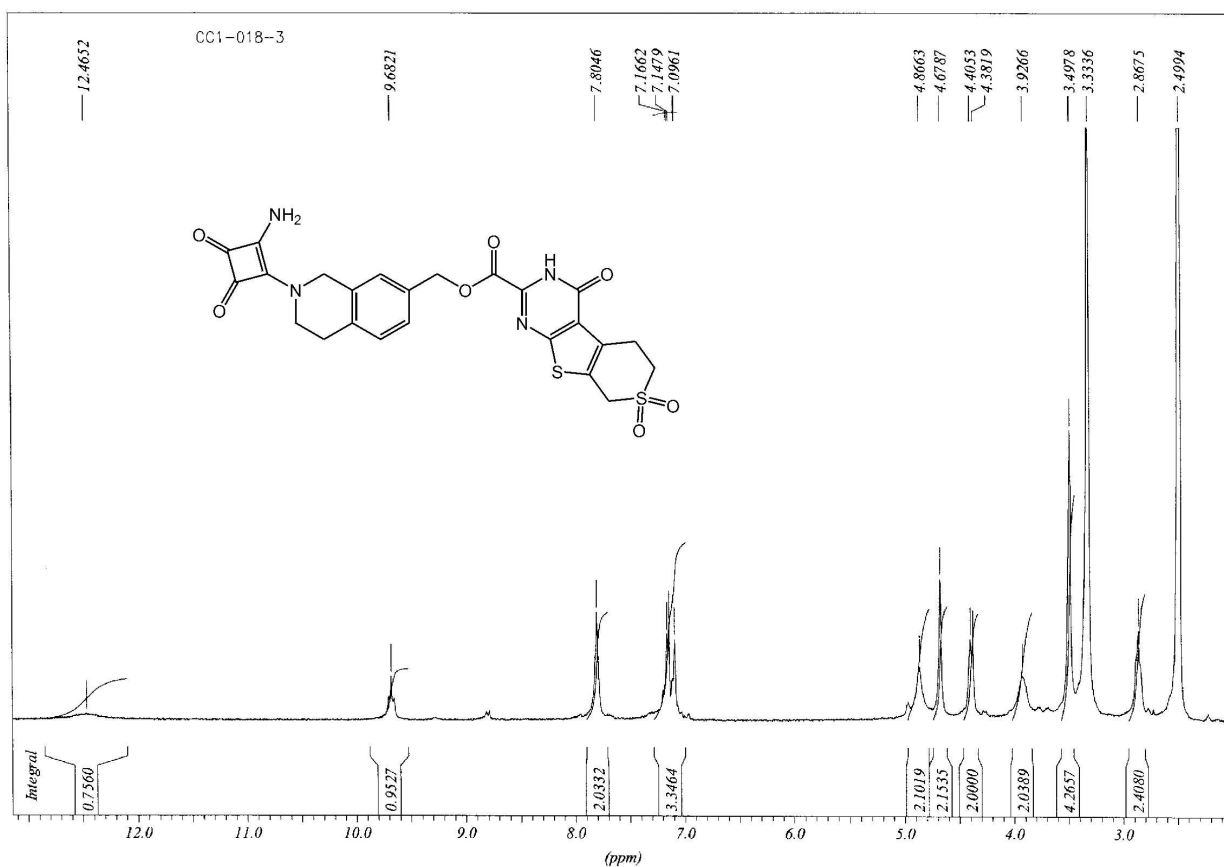

**<sup>1</sup>H NMR (DMSO-*d*<sub>6</sub>) spectra of compound 2.**

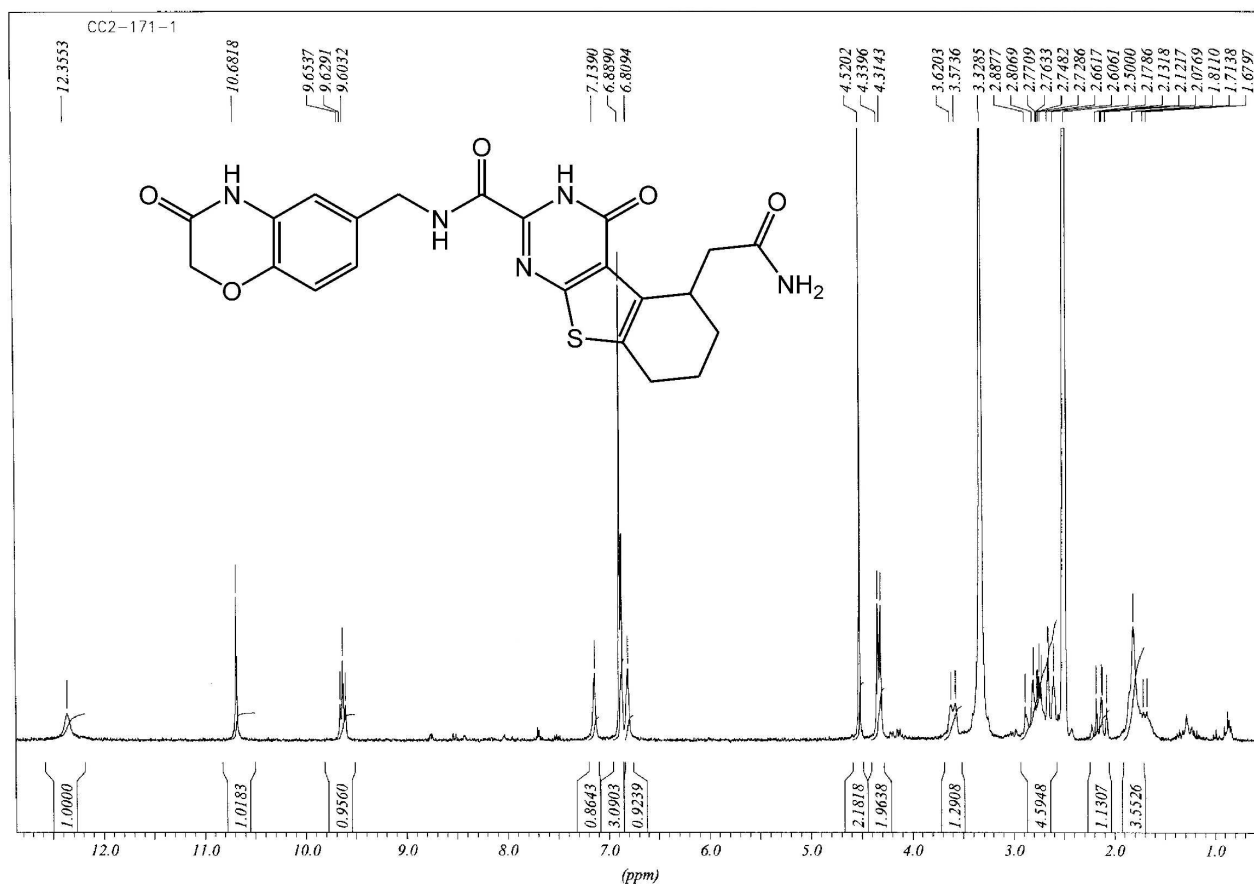

Supplement: Supplementary file 1 [file 4573348]
